# Supplementary material
Source: Springer Nature journal article supplement (https://www.springermedizin.de/resource/supplementary/12885_2011_2919_MOESM1_ESM.pdf/9462280)

$\alpha$  1-307

$\beta$  308-1390

HPRC

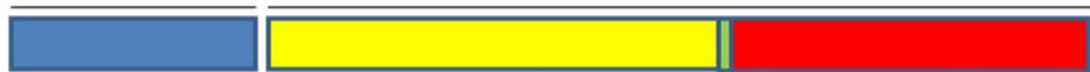

c.406 G>A; V136I

c. 504 G>T; E168D

c.2975 C>T; T992I

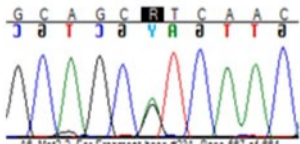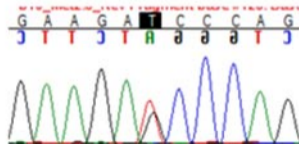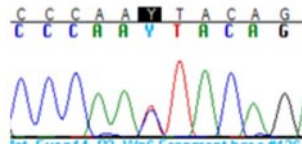

Supplement: MOESM1 [file 9462280]
